# Supplementary material
Source: PubMed Central journal article supplement (PMC5493208)
Supplement: NIHMS867809-supplement-1.pdf [file NIHMS867809-supplement-1.pdf]

Supplementary Figures for:

**Uncoupling of Oxidative Stress Resistance and Lifespan in  
Long-lived *isp-1* Mitochondrial Mutants in *Caenorhabditis  
elegans***

Dylan J. Dues, Claire E. Schaar, Benjamin K. Johnson, Megan J. Bowman, Mary E. Winn, Megan M. Senchuk, Jeremy M. Van Raamsdonk

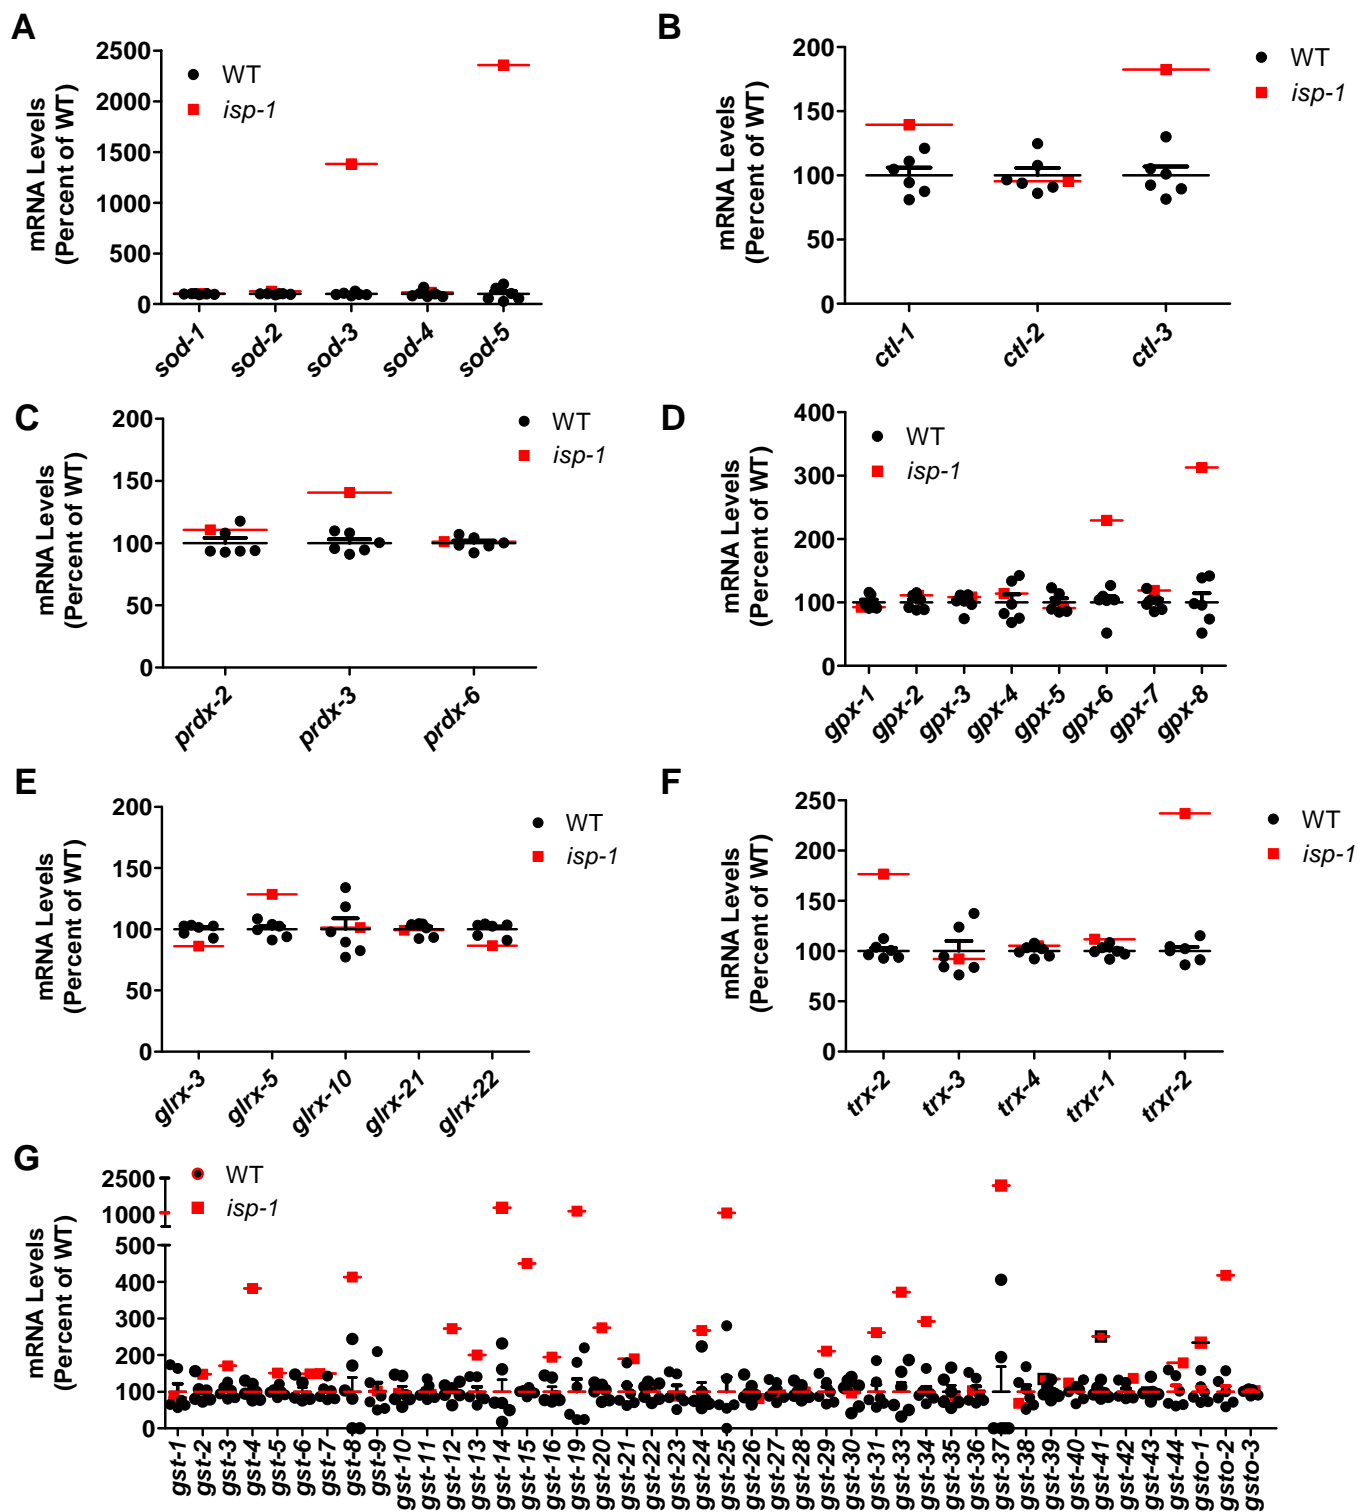

**Supplementary Fig. S1. Upregulation of specific antioxidant genes in *isp-1* worms.** The expression of antioxidant enzymes was assessed using RNA sequencing. Six independent biological samples were collected for both WT and *isp-1* worms. RNA sequencing for *isp-1* worms was performed on a pooled sample containing equal proportions of the six biological replicates **A**. *sod-3* and *sod-5* were markedly upregulated in *isp-1* worms **B**. Among the catalase genes *ctl-3* expression was increased in *isp-1* worms **C**. None of the peroxireodxin (*prdx*) genes were increased in *isp-1* worms. **D**. Among the glutathione peroxidase genes, *gpx-6* and *gpx-8* were increased in *isp-1* worms. **E**. There was no difference in the expression of glutaredoxin genes. **F**. Thioredoxin 2 (*trx-2*) and thioredoxin reductase 2 (*trx-2*) were increased in *isp-1* worms. **G**. Multiple glutathione reductase genes showed upregulation in *isp-1* worms. Counts per million (CPM) were normalized to the average CPM of the wild-type samples to obtain percent of WT.

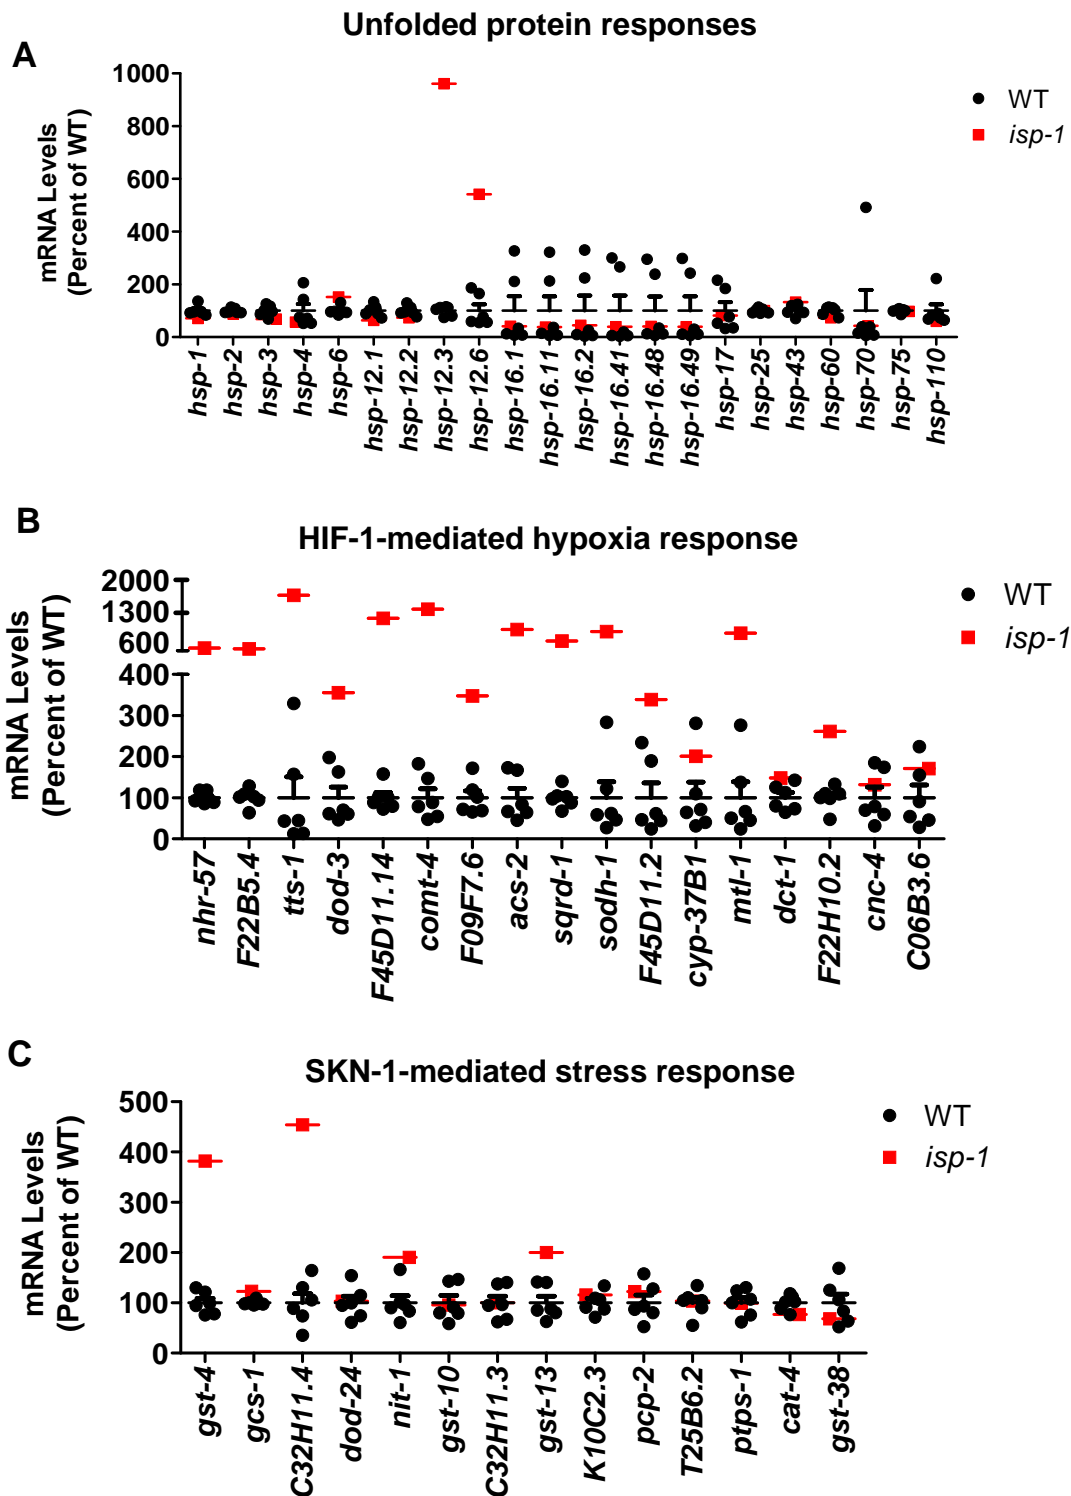

**Supplementary Fig. S2. Activation of stress response pathways in *isp-1* worms.** The expression of gene targets of different stress response pathways was assessed using RNA sequencing. Six independent biological samples were collected for both WT and *isp-1* worms. RNA sequencing for *isp-1* worms was performed on a pooled sample containing equal proportions of the six biological replicates. **A.** *isp-1* worms did not exhibit a marked increase in genes associated with the cytosolic unfolded protein response (*hsp-16.11*, *hsp-16.2*), the mitochondrial unfolded protein response (*hsp-6*, *hsp-60*) or the endoplasmic reticulum unfolded protein response (*hsp-4*). *isp-1* worms did exhibit increased expression of *hsp-12.3* and *hsp-12.6*. **B.** *isp-1* worms exhibited upregulation of many genes associated with the HIF-1-mediated hypoxia response. **C.** Select genes associated with the SKN-1-mediated oxidative stress response were upregulated in *isp-1* worms. Counts per million (CPM) were normalized to the average CPM of the wild-type samples to obtain percent of WT.

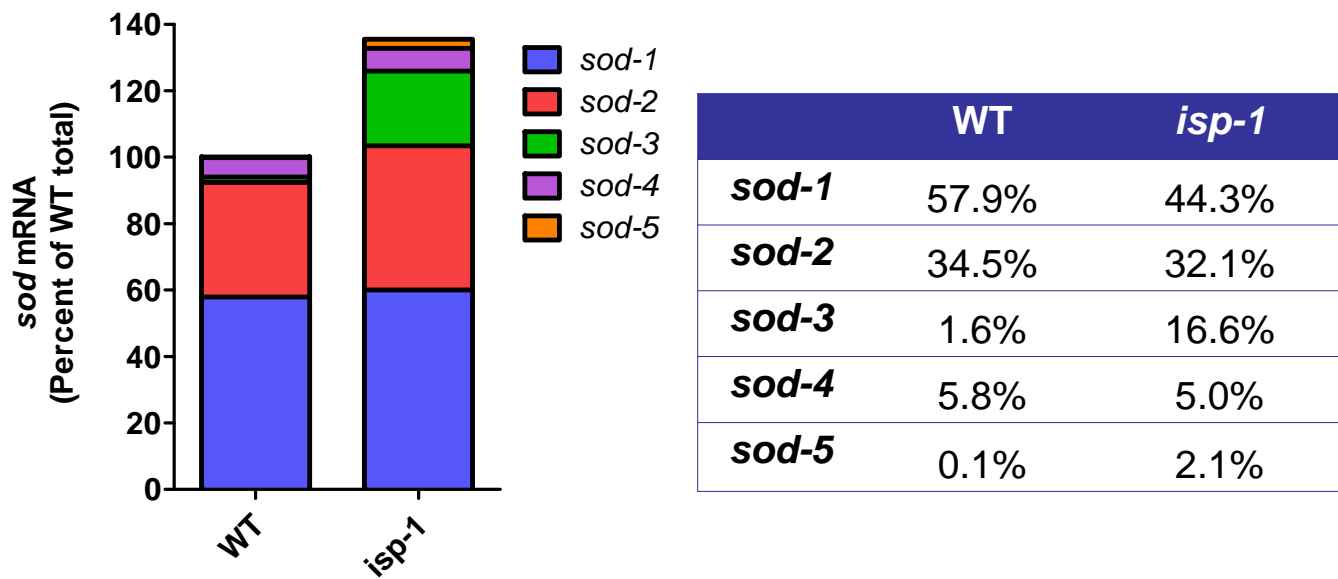

**Supplementary Fig. S3. Comparison of *sod* mRNA levels in WT and *isp-1* worms. A.** *isp-1* worms exhibit increased expression of *sod-3* and *sod-5* mRNA compared to WT worms leading to an overall increase in *sod* expression. **B.** This table shows the percent contribution of each *sod* gene to the total *sod* mRNA. In *isp-1* worms there is a marked increase in the contribution of *sod-3* and *sod-5*. However, their expression is still less than *sod-2* and *sod-1* in the mitochondria and cytoplasm, respectively.

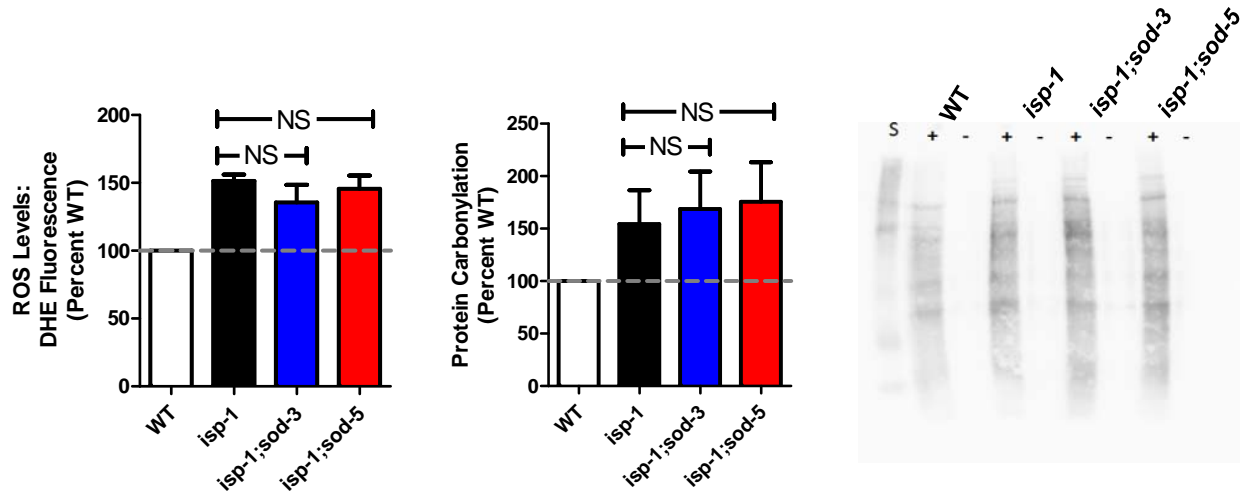

**Supplementary Fig. S4. Deletion of inducible *sod* genes does not increase ROS levels or oxidative damage in *isp-1* worms.** **A.** Quantification of ROS levels by staining with the ROS-sensitive dye DHE revealed no difference between *isp-1* worms and *isp-1;sod-3* or *isp-1;sod-5* worms. **B.** Similarly, *isp-1;sod-3* and *isp-1;sod-5* worms showed a similar level of oxidative damage to proteins to *isp-1* worms, as measured by protein carbonylation. **C.** Representative blot for carbonylated proteins. Error bars indicate SEM. Only significant differences between *isp-1* and *isp-1;sod-3* or *isp-1;sod-5* worms are indicated.

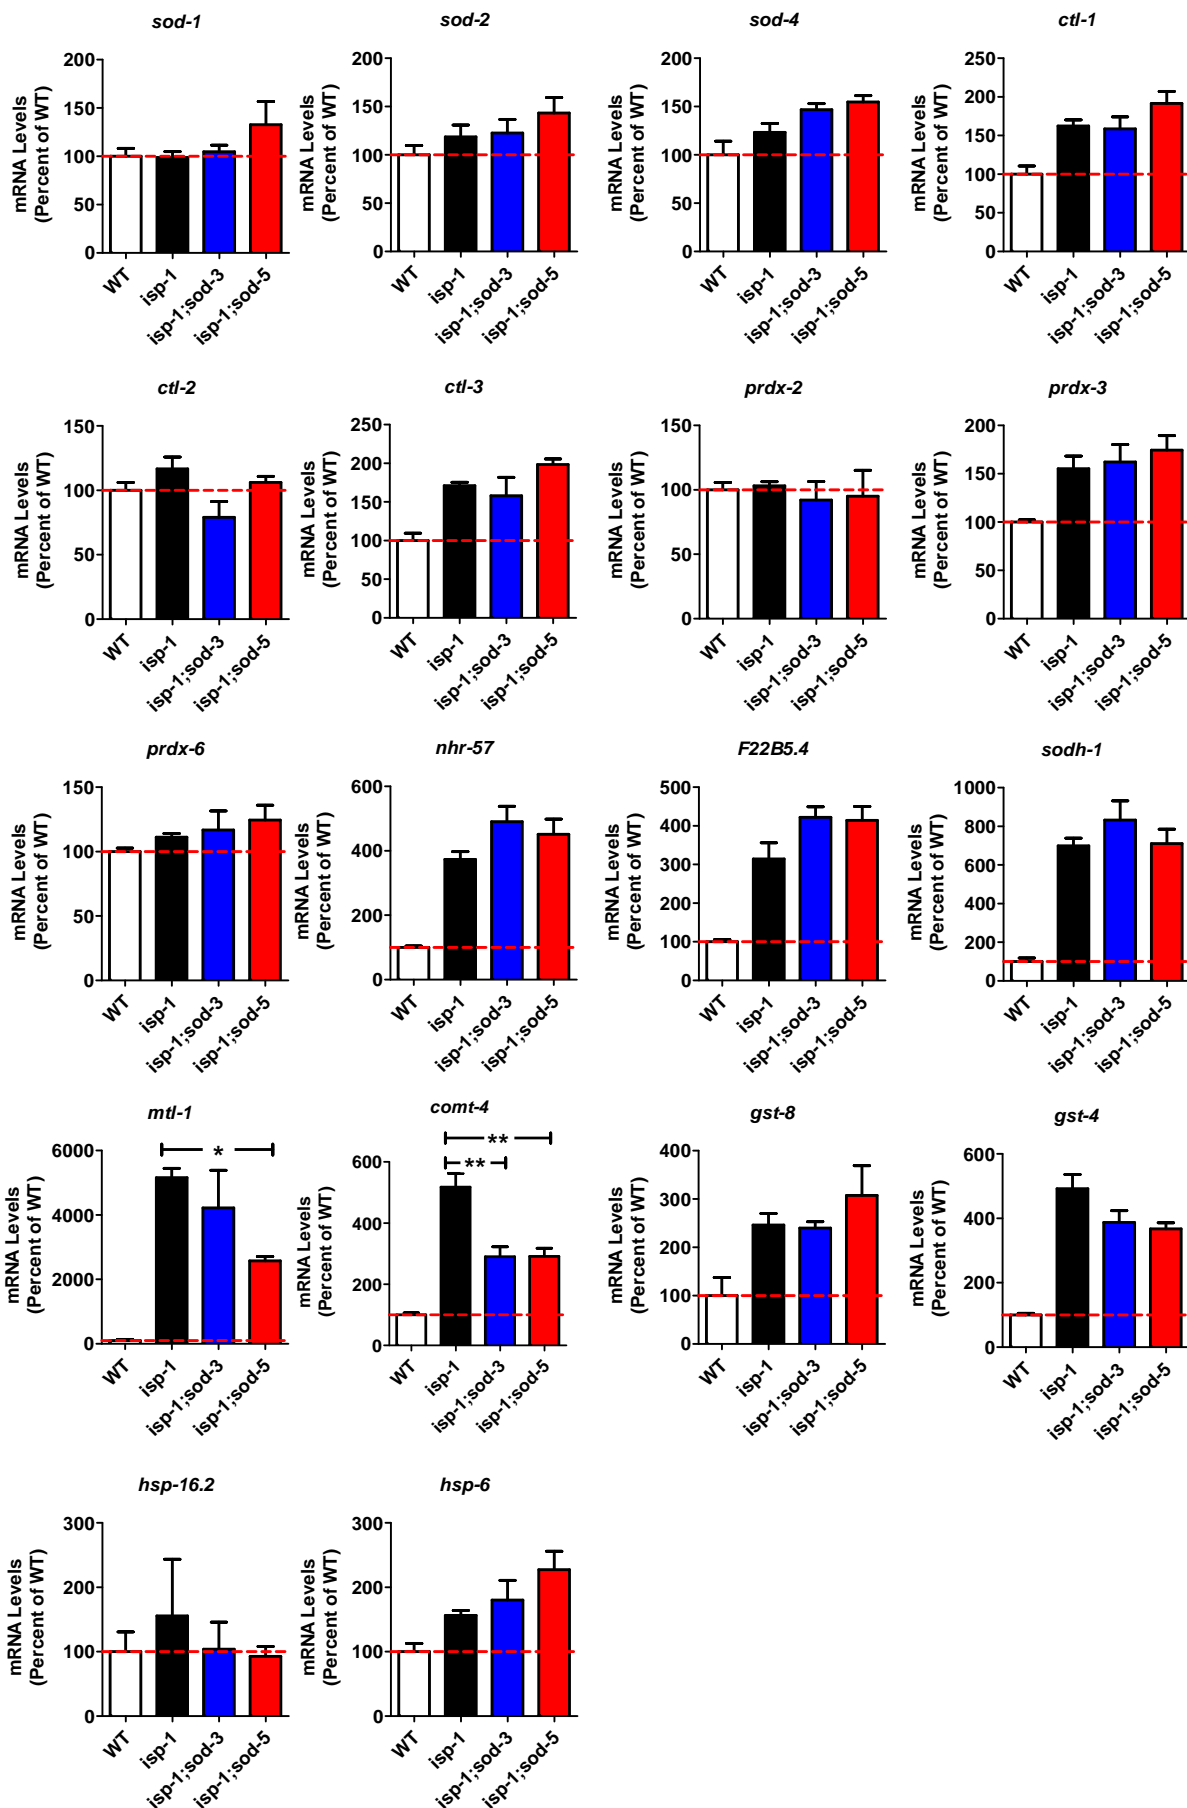

**Supplementary Fig. S5. Deletion of inducible *sod* genes has little effect on the expression of select antioxidant and stress response genes in *isp-1* worms.** Gene expression was measured by quantitative real-time RT-PCR. Six biological replicates were collected and pooled into three samples for analysis. Error bars indicate SEM. Only significant differences between *isp-1* and *isp-1;sod-3* or *isp-1;sod-5* worms are indicated.

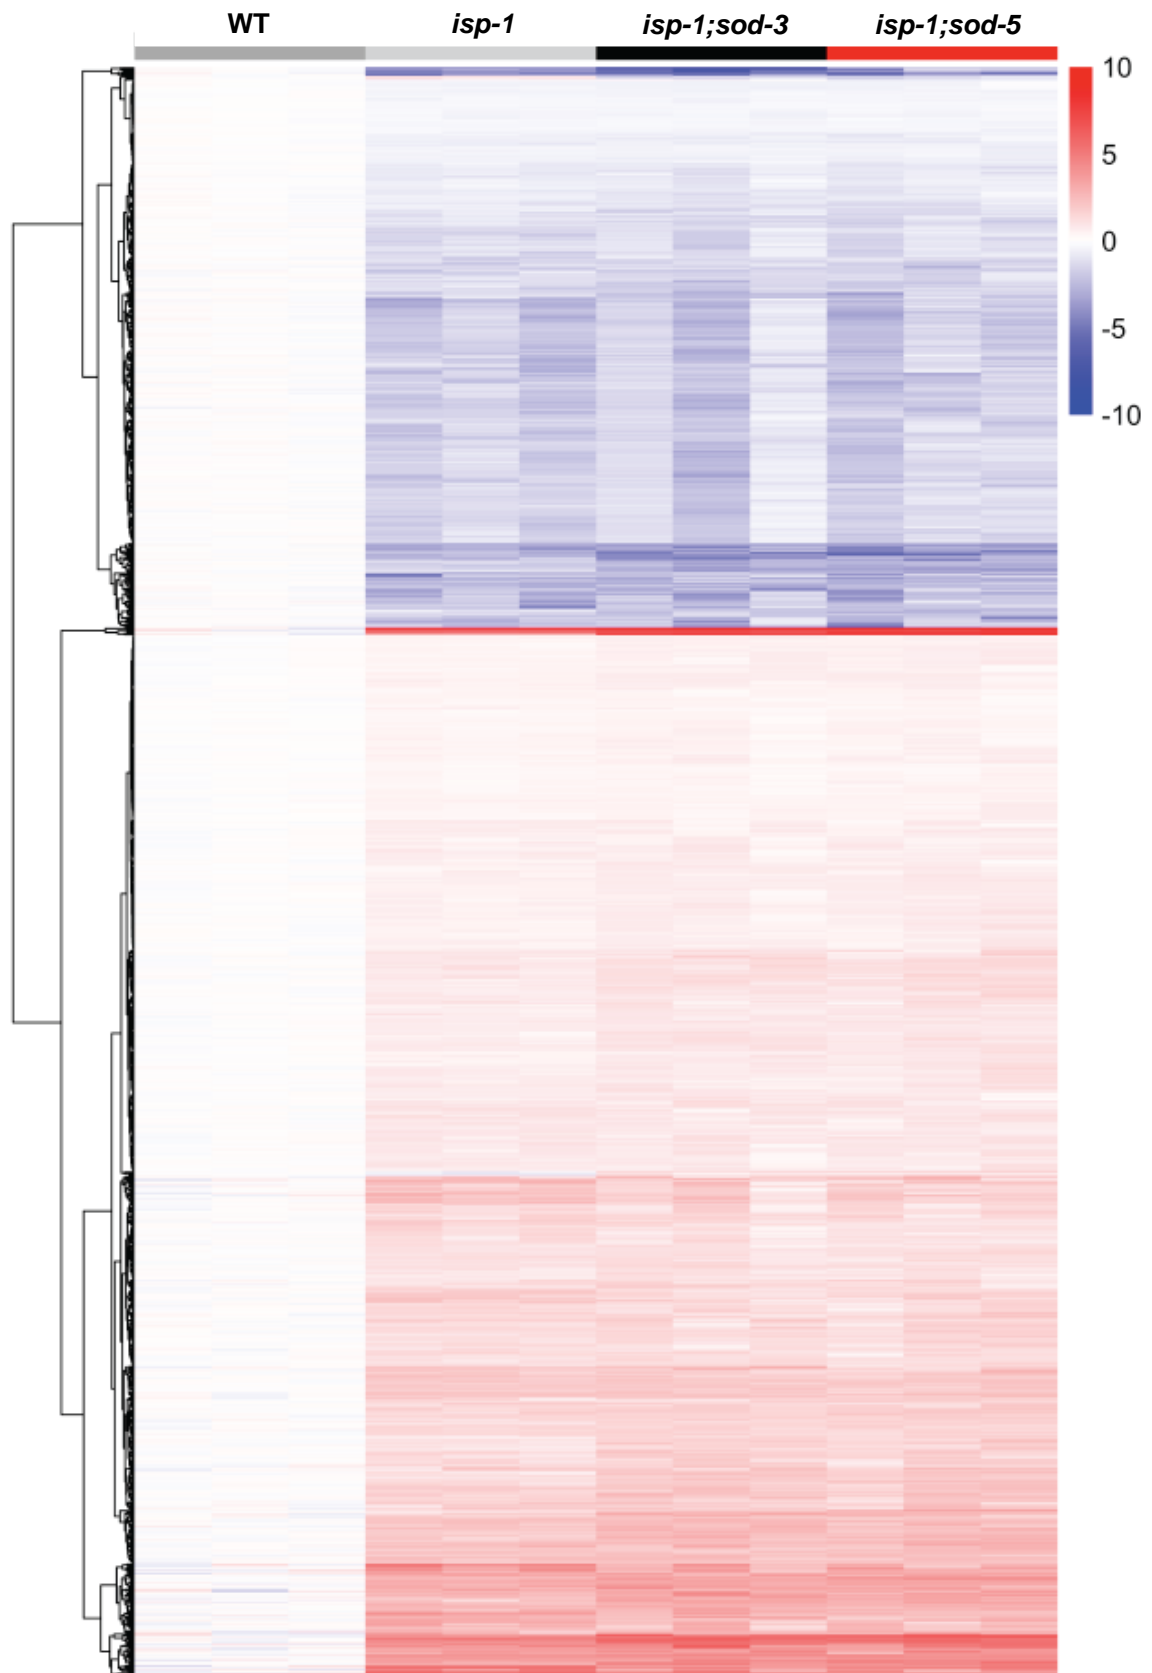

**Supplementary Fig. S6. Gene expression changes in *isp-1*, *isp-1;sod-3* and *isp-1;sod-5* worms compared to WT.** RNA sequencing was used to compare gene expression in *isp-1* worms, *isp-1;sod-3* worms and *isp-1;sod-5* worms to WT worms. Overall, *isp-1;sod-3* and *isp-1;sod-5* worms exhibit similar changes in gene expression to *isp-1* worms. Nonetheless, there are multiple genes that show differences in gene expression between *isp-1* worms and the *isp-1;sod* double mutants. Nine biological replicates were collected for each strain and pooled to make three samples for RNA sequencing.

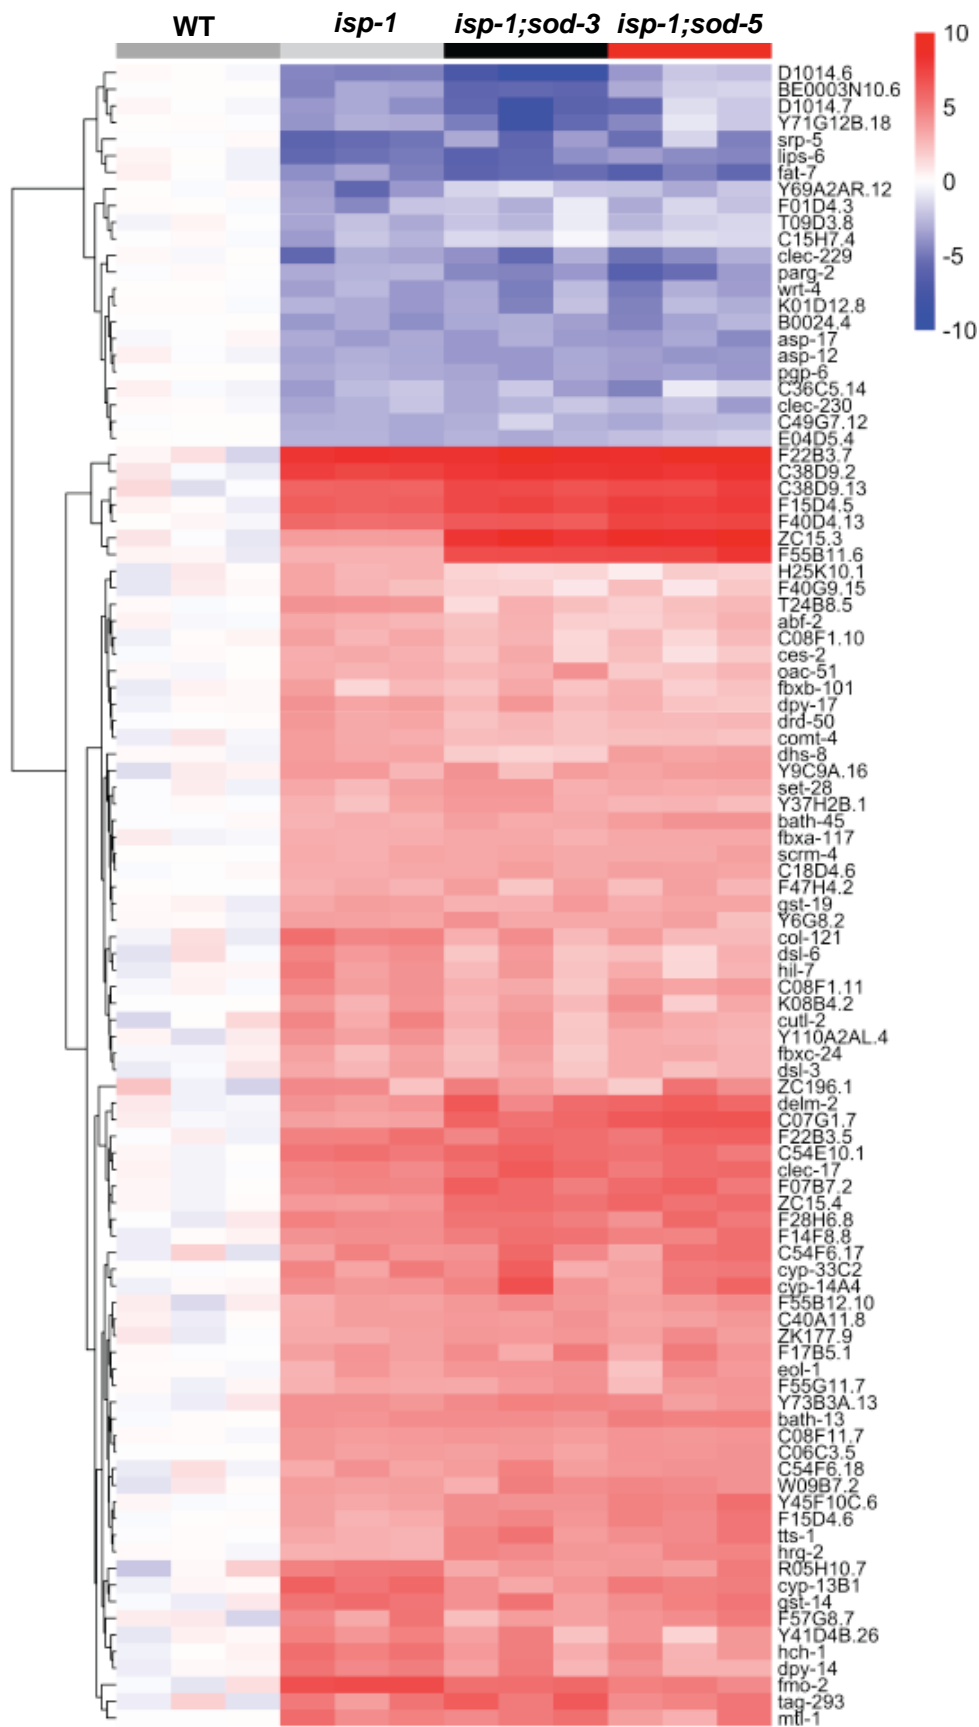

**Supplementary Fig. S7. Gene expression changes in *isp-1*, *isp-1;sod-3* and *isp-1;sod-5* worms compared to WT – top 100 differentially expressed genes.** RNA sequencing was used to compare gene expression in *isp-1* worms, *isp-1;sod-3* worms and *isp-1;sod-5* worms to WT worms. Overall, *isp-1;sod-3* and *isp-1;sod-5* worms exhibit similar changes in gene expression to *isp-1* worms. Nonetheless, there are multiple genes that show differences in gene expression between *isp-1* worms and the *isp-1;sod* double mutants. Nine biological replicates were collected for each strain and pooled to make three samples for RNA sequencing.



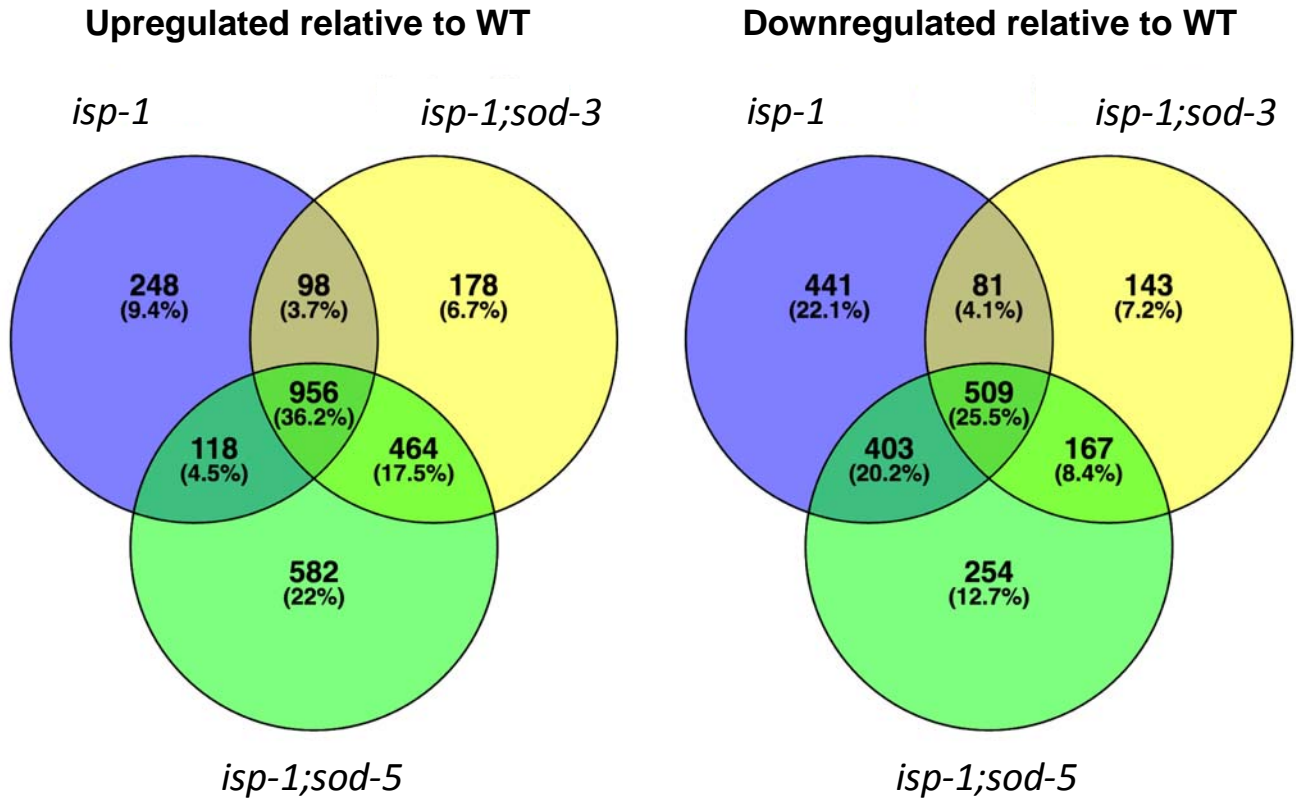

**Supplementary Fig. S8. Venn diagrams of differentially expressed genes in *isp-1*, *isp-1;sod-3*, and *isp-1;sod-5* worms relative to WT worms.** A large overlap of differentially expressed genes across all *isp-1* mutants exists, suggesting that *isp-1* deficiency drives large transcriptional alterations. Nonetheless, *isp-1;sod-3* and *isp-1;sod-5* mutants exhibit changes in genes expression that are unique from *isp-1* worms that may affect lifespan, stress resistance and physiologic rates. All genes  $q < 0.05$ .

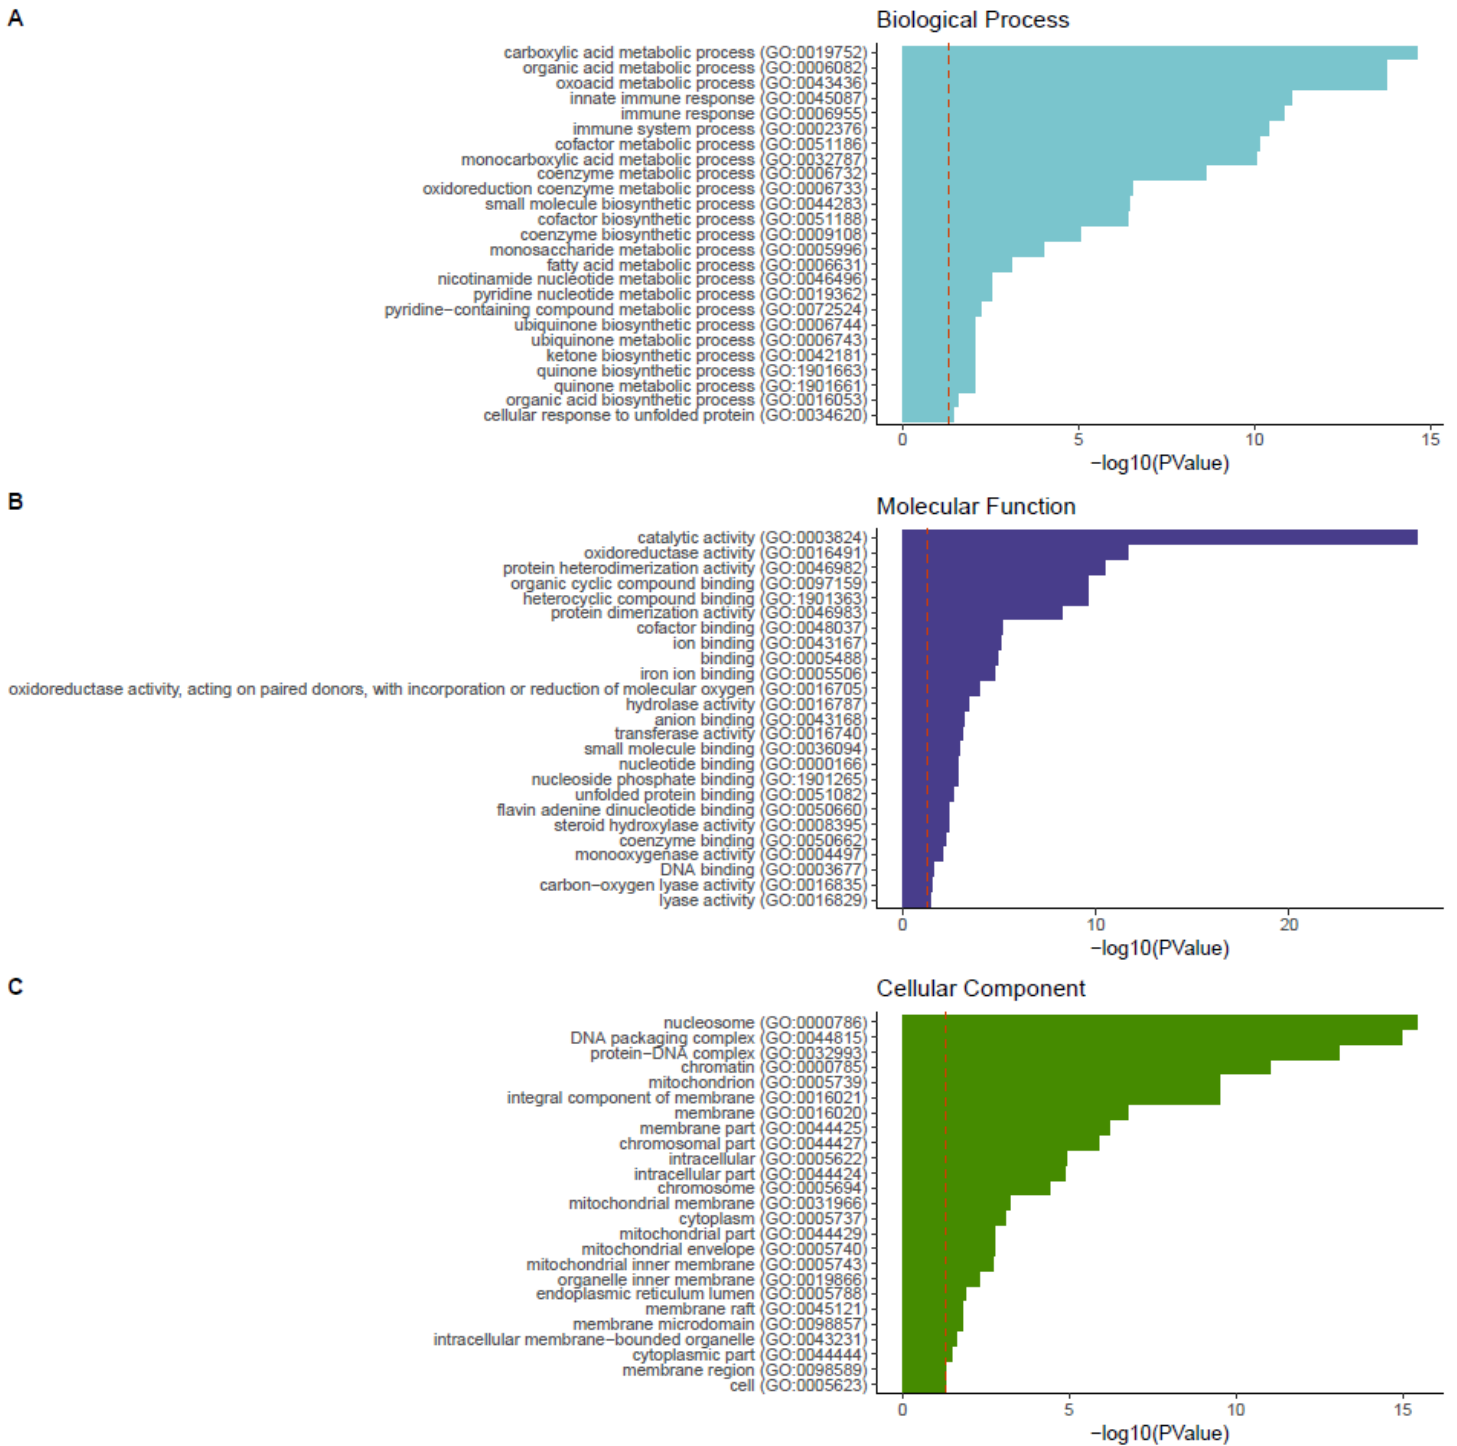

**Supplementary Fig. S9. Gene ontology enrichment of gene expression changes in *isp-1*, *isp-1;sod-3* and *isp-1;sod-5* worms compared to WT.** Commonly differentially expressed genes between *isp-1*, *isp-1;sod-3* and *isp-1;sod-5* were analyzed for gene ontology category enrichment in biological processes, molecular function, and cellular components. GO terms can be searched on [geneontology.org](http://geneontology.org). Dotted red line indicates  $P = 0.05$ .

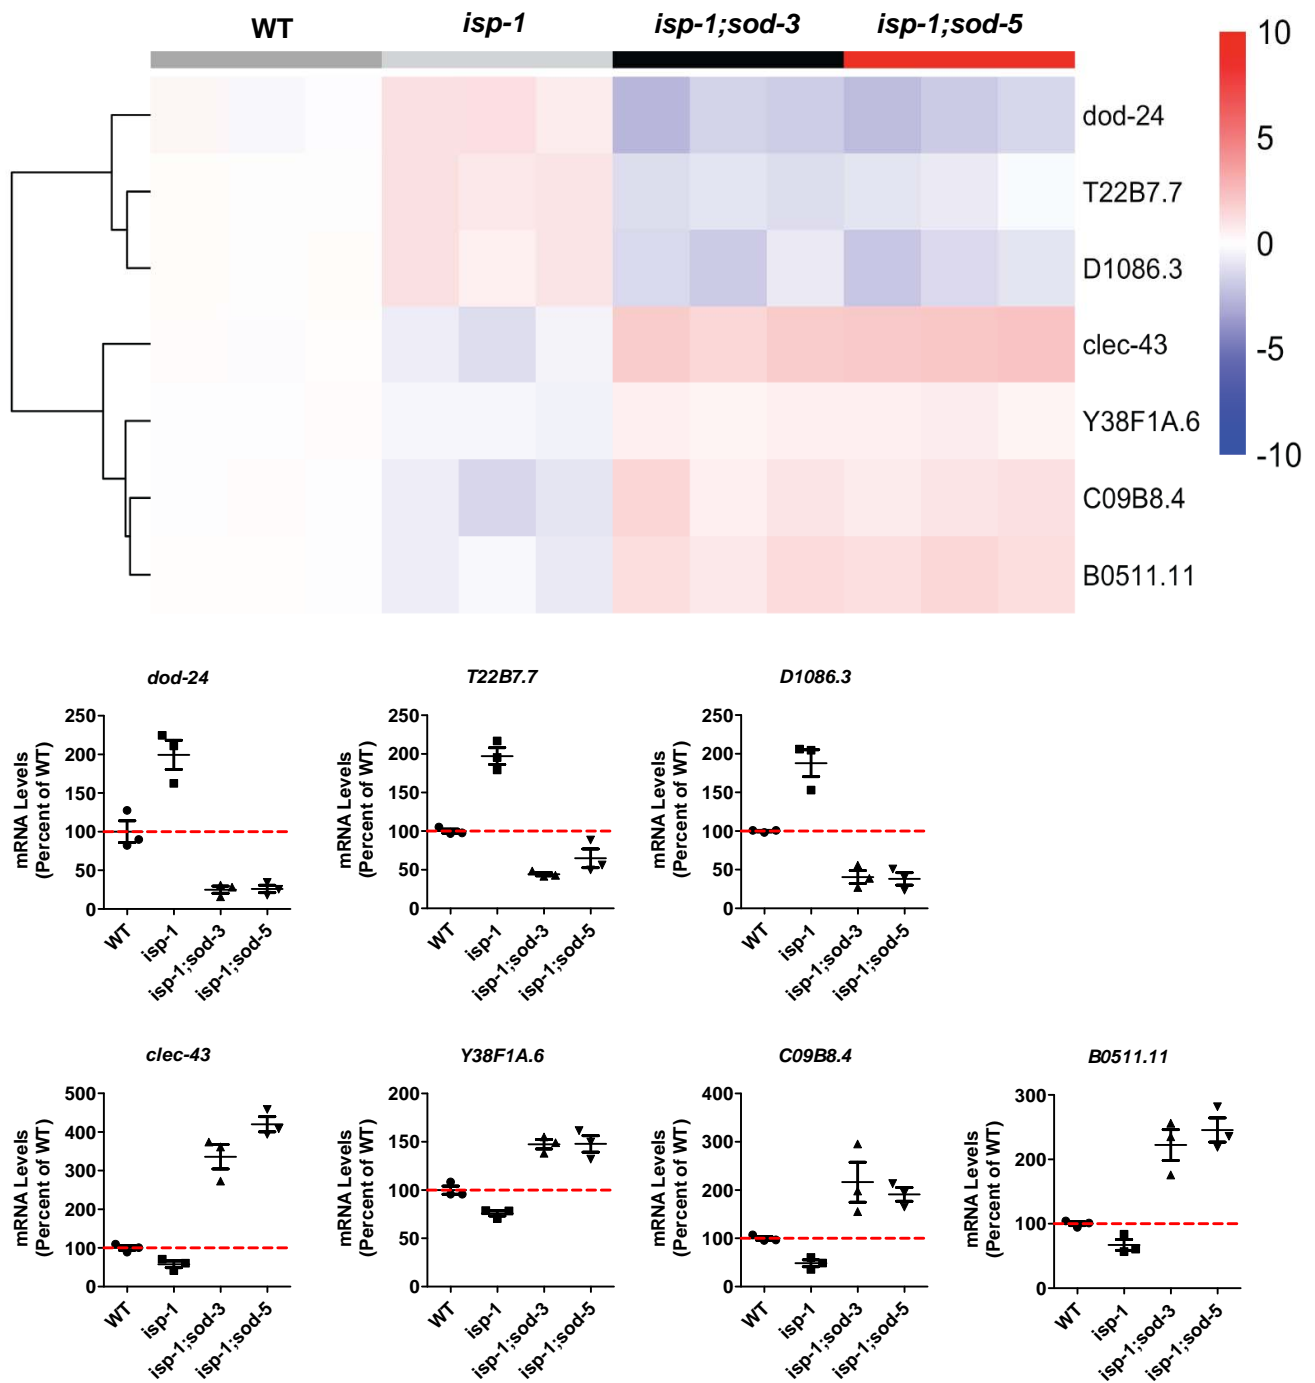

**Supplementary Fig. S10. A subset of genes shows opposite expression patterns between *isp-1* worms and *isp-1;sod-3* and *isp-1;sod-5* double mutants.** RNA sequencing was used to compare expression in *isp-1* worms, *isp-1;sod-3* worms and *isp-1;sod-5* worms to WT worms. Inversion of expression profiles of differentially expressed genes in *isp-1* mutants reveals genotype specific changes in transcriptional profiles relative to the mean WT expression. Genes that show an altered pattern of expression between *isp-1* worms and *isp-1;sod-3* and *isp-1;sod-5* worms may account for the differences observed in lifespan, stress resistance and physiologic rates.

## KEGG Enrichment

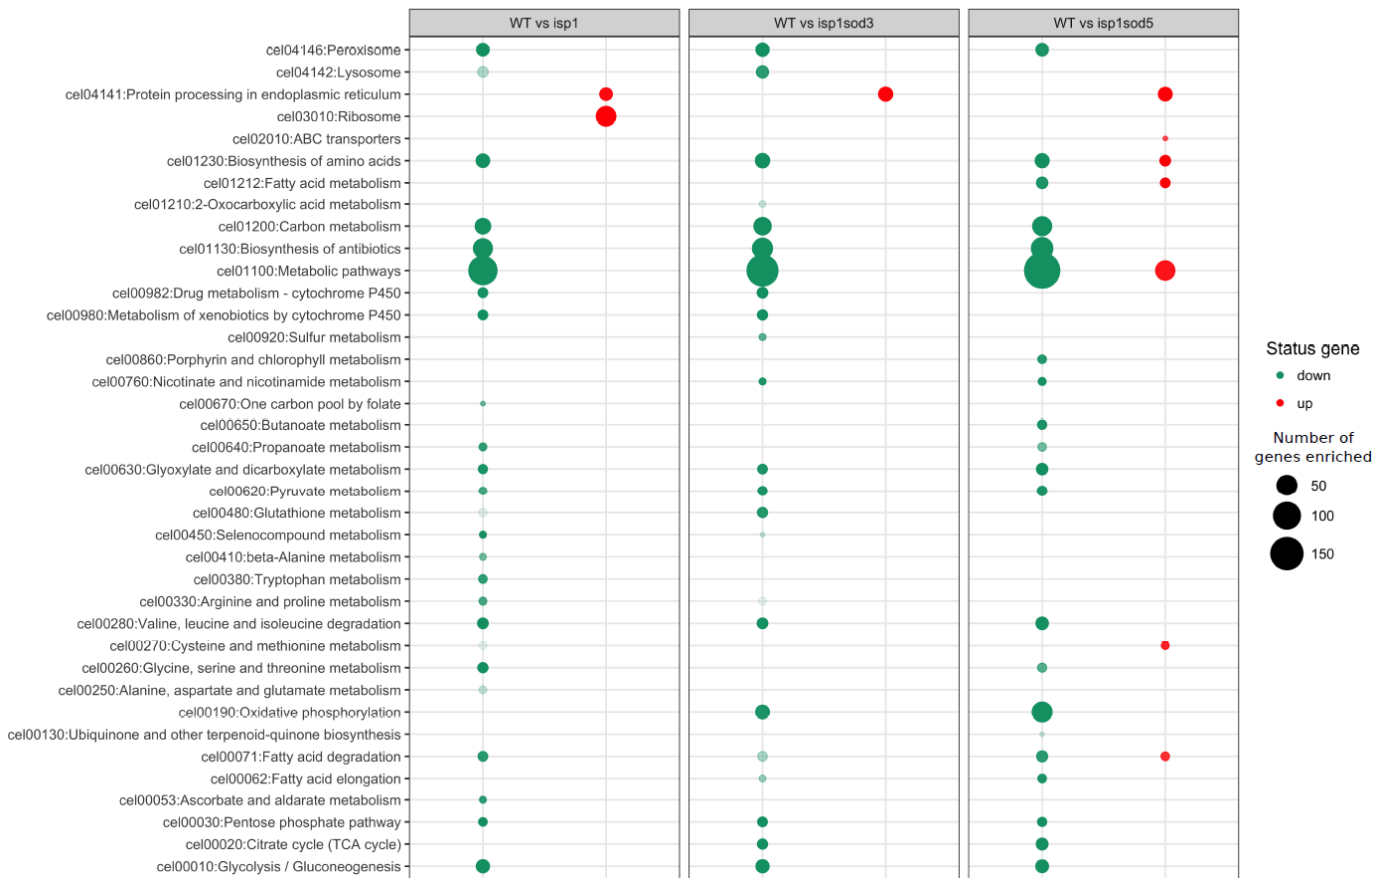

**Supplementary Fig. S11. KEGG enrichment of differentially expressed genes in *isp-1*, *isp-1;sod-3* and *isp-1;sod-5* worms relative to WT worms.** Differentially expressed genes in *isp-1* mutants were examined for KEGG pathway enrichment. Enrichment suggests genotype common and unique metabolic changes. The “ribosome” category is upregulated in *isp-1* mutants but not *isp-1;sod-3* or *isp-1;sod-5* double mutants, while “oxidative phosphorylation” and “citric acid cycle” are downregulated in *isp-1;sod-3* and *isp-1;sod-5* mutants but not in *isp-1* mutants. Dot sizes represent the number of differentially expressed genes ( $q < 0.05$ ) that compose that enriched process. Green and red dots are downregulated and upregulated genes, respectively.

## Reactome Enrichment

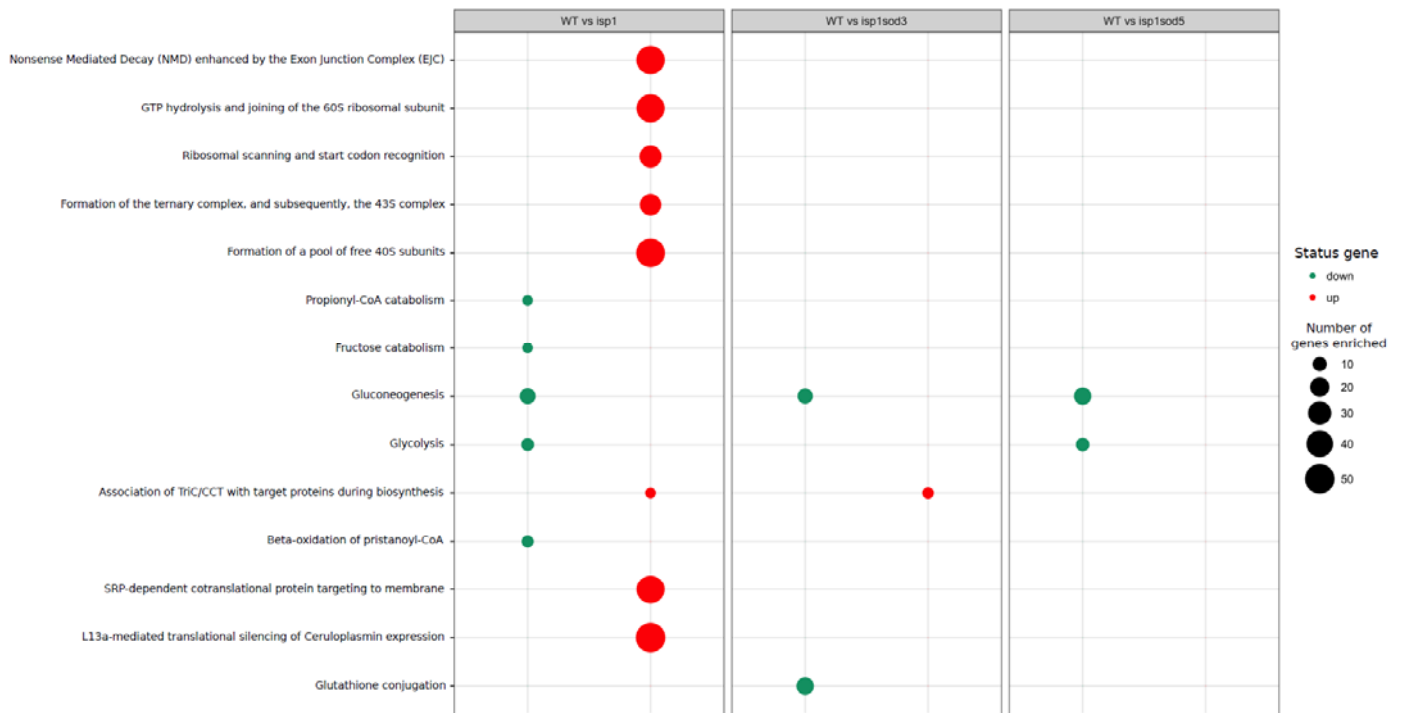

**Supplementary Fig. S12. Reactome enrichment of differentially expressed genes in *isp-1*, *isp-1;sod-3* and *isp-1;sod-5* worms relative to WT worms.** Differentially expressed genes in *isp-1* mutants were examined for reactome pathway enrichment. Enrichment suggests genotype common and unique metabolic changes. Notably, *isp-1* worms exhibit upregulation of seven groups of genes relative to *isp-1;sod-3* and *isp-1;sod-5* worms. Dot sizes represent the number of differentially expressed genes ( $q < 0.05$ ) that compose that enriched process. Green and red dots are downregulated and upregulated genes, respectively.

**Genes upregulated in *isp-1* worms**

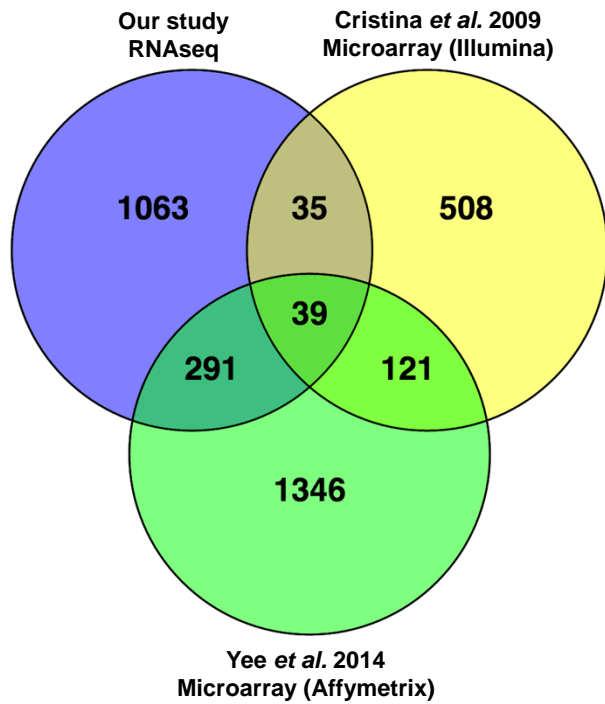

**Genes downregulated in *isp-1* worms**

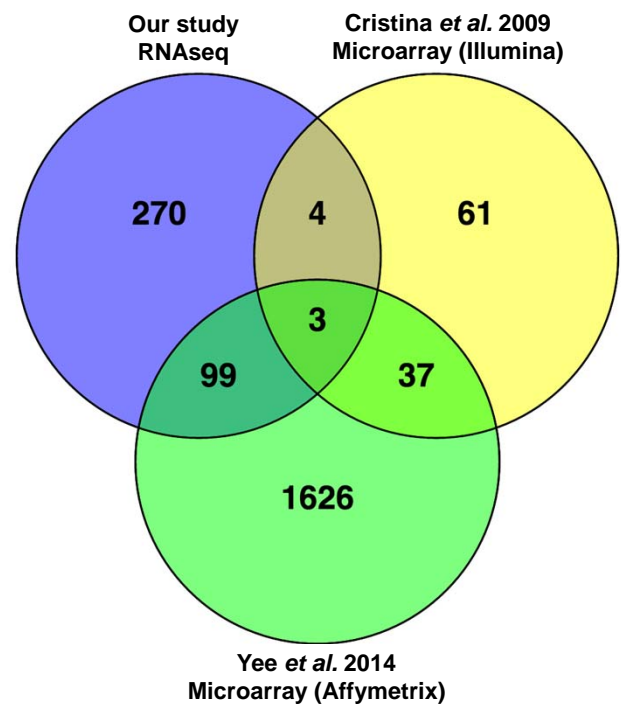

**Supplementary Fig. S13. Gene expression changes in *isp-1* worms.** Venn diagram of overlapping changes in gene expression with previous microarray studies.

**Supplementary Table S1. Summary of Lifespan Experiments**

|                         | Mean Lifespan | Count | Significance | Max Lifespan | Significance |
|-------------------------|---------------|-------|--------------|--------------|--------------|
| <b>Combined Results</b> |               |       |              |              |              |
| <i>isp-1</i>            | 40.5 ± 12.8   | 290   |              | 63.8 ± 3.2   |              |
| <i>isp-1;sod-3</i>      | 33.0 ± 9.4    | 244   | p < 0.001    | 54.6 ± 3.0   | p < 0.001    |
| <i>isp-1;sod-5</i>      | 33.8 ± 10.5   | 272   | p < 0.001    | 58.3 ± 2.6   | p < 0.001    |
| <b>Trial 1</b>          |               |       |              |              |              |
| <i>isp-1</i>            | 42.4 ± 13.7   | 71    |              | 60.6 ± 4.9   |              |
| <i>isp-1;sod-3</i>      | 31.8 ± 12.1   | 59    | p < 0.001    | 52.2 ± 3.9   | p < 0.001    |
| <i>isp-1;sod-5</i>      | 34.0 ± 11.3   | 77    | p < 0.001    | 52.3 ± 5.0   | p = 0.0015   |
| <b>Trial 2</b>          |               |       |              |              |              |
| <i>isp-1</i>            | 32.9 ± 9.1    | 94    |              | 49.9 ± 4.7   |              |
| <i>isp-1;sod-3</i>      | 31.1 ± 9.2    | 59    | p = 0.1323   | 40.4 ± 2.9   | p < 0.001    |
| <i>isp-1;sod-5</i>      | 28.7 ± 6.0    | 63    | p < 0.001    | 40.1 ± 3.1   | p < 0.001    |
| <b>Trial 3</b>          |               |       |              |              |              |
| <i>isp-1</i>            | 43.3 ± 13.8   | 55    |              | 59.1 ± 1.4   |              |
| <i>isp-1;sod-3</i>      | 35.0 ± 9.4    | 66    | p < 0.001    | 49.2 ± 3.9   | p < 0.001    |
| <i>isp-1;sod-5</i>      | 37.1 ± 11.5   | 68    | p = 0.008    | 57.2 ± 1.7   | p = 0.015    |
| <b>Trial 4</b>          |               |       |              |              |              |
| <i>isp-1</i>            | 46.6 ± 10.3   | 70    |              | 61.1 ± 2.6   |              |
| <i>isp-1;sod-3</i>      | 33.9 ± 8.8    | 60    | p < 0.001    | 47.2 ± 5.0   | p < 0.001    |
| <i>isp-1;sod-5</i>      | 35.1 ± 10.1   | 64    | p < 0.001    | 51.7 ± 2.7   | p < 0.001    |

**Supplementary Table S3. Effect of deleting inducible superoxide dismutase genes on *isp-1* physiologic rates, oxidative stress sensitivity and lifespan.**

|                                        |                              | <i>isp-1</i><br>(vs. WT) | <i>isp-1;sod-3</i><br>(vs <i>isp-1</i> ) | <i>isp-1;sod-5</i><br>(vs <i>isp-1</i> ) |
|----------------------------------------|------------------------------|--------------------------|------------------------------------------|------------------------------------------|
| <b>Physiologic Rates</b>               | Post-embryonic development   | ↑                        | ↑                                        | ↑                                        |
|                                        | Brood size                   | ↓                        | ↓                                        | ↓                                        |
|                                        | Defecation cycle length      | ↑                        | ↑                                        | ↑                                        |
|                                        | Thrashing Rate               | ↓                        | ↓                                        | ↓                                        |
| <b>Sensitivity to Oxidative Stress</b> | Development: 0.3 mM Paraquat | ↓                        | ↑                                        | ↑                                        |
|                                        | Day 1 Adult: 240 uM Juglone  | ↑                        | ↑                                        | ↑                                        |
|                                        | Adulthood: 4 mM PQ           | ↑                        | ↓                                        | ↓                                        |
| <b>Lifespan</b>                        |                              | ↑                        | ↓                                        | ↓                                        |

Red arrows indicate phenotypic exacerbation or less healthy phenotype, while green arrows represent an improved phenotype.
